# Supplementary material for: Disentangling greenhouse warming and aerosol cooling to reveal Earth’s climate sensitivity
Source: Springer Nature journal article supplement (doi:10.1038/ngeo2670), 2016-03-14
Supplement: 41561_2016_BFngeo2670_MOESM241_ESM.pdf [file 41561_2016_BFngeo2670_MOESM241_ESM.pdf]

# Disentangling greenhouse warming and aerosol cooling to reveal Earth's climate sensitivity

T. Storelvmo, T. Leirvik, U. Lohmann, P. C. B. Phillips, and M. Wild

January 21, 2016

## 1 Overview

This Supplement provides tabulated results of regression estimates and tests described in the Online Methods Section (OMS) to Storelvmo et al. (2016). The 5 tables given below detail findings obtained from the following tests and estimation procedures. References, variable notation, and tests, including acronyms, are as given in the OMS document.

1. Table S1 provides results of unit root tests designed to assess evidence for the presence of stochastic trends in the variables used in the panel regressions in the main paper. Both unit root null and stationary null hypotheses are tested, as described in the OMS.
2. Table S2 provides results of residual based tests for cointegration among the global variables in the system.
3. Table S3 reports estimation and confidence interval results for a model extension that allows for parameter differentiation across latitudes into four spatial regions. Details are provided in the OMS.
4. Table S4 provides the results of a stationarity test for the time specific effect in the model, which serves as a long run equilibrium error effect in global energy balance.
5. Table S5 reports alternative estimates of the global level variable coefficients obtained by dynamic ordinary least squares regression (rather than panel least squares regression), an estimation method that accommodates nonstationarity and cointegrating links among the variables.

## 2 Tables

**Table S1:** Test results for the presence of a unit root using ADF, PP coefficient, and KPSS tests. The ADF and PP results allow for a fitted intercept. Similar results were obtained in ADF and PP regression tests with a deterministic trend with the exception of  $T_t$ , where the null of a unit root with drift was rejected in favor of trend stationarity (p value 0.001).

| Test                                    | Variable    | p value | Unit Root |
|-----------------------------------------|-------------|---------|-----------|
| Tests with a null of stochastic trend   |             |         |           |
| ADF                                     | $T_t$       | 0.17    | Y         |
| PP                                      | $T_t$       | 0.17    | Y         |
| ADF                                     | $R_t$       | 0.31    | Y         |
| PP                                      | $R_t$       | 0.31    | Y         |
| ADF                                     | $CO_{2,eq}$ | 0.87    | Y         |
| PP                                      | $CO_{2,eq}$ | 0.87    | Y         |
| Tests with a null of trend stationarity |             |         |           |
| KPSS                                    | $T_t$       | 0.06    | Y*        |
| KPSS                                    | $R_t$       | 0.01    | Y***      |
| KPSS                                    | $CO_{2,eq}$ | 0.01    | Y***      |

**Table S2:** Test results for the presence of cointegration between temperature, radiation and  $CO_{2,eq}$  using Phillips-Ouliaris (1990) residual based coefficient ( $z$ ) and t ratio ( $\tau$ ) tests with an intercept in the regression. Similar results were obtained from the same residual based tests with a deterministic trend in the regression.

| Test Statistic | Variables: $T_t$ and  | Stat Value | p value | Cointegration |
|----------------|-----------------------|------------|---------|---------------|
| $z$            | $R_t$                 | -18.660    | 0.013   | Y             |
| $\tau$         | $R_t$                 | -3.378     | 0.014   | Y             |
| $z$            | $CO_{2,eq}$           | -37.621    | 0.001   | Y             |
| $\tau$         | $CO_{2,eq}$           | -5.511     | 0.001   | Y             |
| $z$            | $R_t$ and $CO_{2,eq}$ | -6.584     | 0.000   | Y             |
| $\tau$         | $R_t$ and $CO_{2,eq}$ | -46.436    | 0.000   | Y             |

**Table S3:** Results of the first model extension described in the OMS, in which we estimate new parameter values for four separate latitude bands. The number of surface stations in each latitude band were 127 (SH), 192 (Tr), 556 (NHs) and 374 (NHh).

| Parameter  | Region | Value   | Std.Error | 95% Conf. Interval | Variable    | Number of stations |
|------------|--------|---------|-----------|--------------------|-------------|--------------------|
| $\beta_1$  | SH     | 0.9639  | 0.0072    | (0.9498, 0.9779)   | $T_i$       | 127                |
| $\beta_1$  | Tr     | 0.9583  | 0.0070    | (0.9447, 0.9719)   | $T_i$       | 192                |
| $\beta_1$  | NHs    | 0.9181  | 0.0049    | (0.9085, 0.9277)   | $T_i$       | 556                |
| $\beta_1$  | NHh    | 0.9680  | 0.0046    | (0.9590, 0.9769)   | $T_i$       | 374                |
| $\beta_2$  | SH     | 0.0079  | 0.0021    | (0.0038, 0.0121)   | $R_i$       | 127                |
| $\beta_2$  | Tr     | 0.0029  | 0.0013    | (0.0003, 0.0055)   | $R_i$       | 192                |
| $\beta_2$  | NHs    | 0.0093  | 0.0011    | (0.0072, 0.0114)   | $R_i$       | 556                |
| $\beta_2$  | NHh    | 0.0012  | 0.0017    | (-0.002, 0.0045)   | $R_i$       | 374                |
| $\gamma_1$ | SH     | -1.027  | 0.153     | (-1.33, -0.72)     | $T$         | 127                |
| $\gamma_1$ | Tr     | -0.945  | 0.16      | (-1.26, -0.62)     | $T$         | 192                |
| $\gamma_1$ | NHs    | -0.818  | 0.158     | (-1.13, -0.50)     | $T$         | 556                |
| $\gamma_1$ | NHh    | -0.838  | 0.158     | (-1.16, -0.52)     | $T$         | 374                |
| $\gamma_2$ | SH     | -0.009  | 0.0023    | (-0.014, -0.005)   | $R$         | 127                |
| $\gamma_2$ | Tr     | -0.008  | 0.0031    | (-0.014, -0.0014)  | $R$         | 192                |
| $\gamma_2$ | NHs    | -0.0028 | 0.007     | (-0.011, 0.017)    | $R$         | 556                |
| $\gamma_2$ | NHh    | 0.0048  | 0.0076    | (-0.011, 0.020)    | $R$         | 374                |
| $\gamma_3$ | SH     | 3.26    | 0.527     | (2.197, 3.324)     | $CO_{2,eq}$ | 127                |
| $\gamma_3$ | Tr     | 2.362   | 0.601     | (1.151, 3.574)     | $CO_{2,eq}$ | 192                |
| $\gamma_3$ | NHs    | 3.948   | 0.838     | (2.257, 5.638)     | $CO_{2,eq}$ | 556                |
| $\gamma_3$ | NHh    | 3.197   | 0.686     | (1.814, 5.580)     | $CO_{2,eq}$ | 374                |

**Table S4:** Test results for the presence of a unit root in  $\lambda_t$  using ADF, PP coefficient, and KPSS tests. The ADF and PP results allow for a fitted intercept.

| Test                                    | Variable    | p value | Unit Root |
|-----------------------------------------|-------------|---------|-----------|
| Tests with a null of stochastic trend   |             |         |           |
| ADF                                     | $\lambda_t$ | 0.000   | N         |
| PP                                      | $\lambda_t$ | 0.000   | N         |
| Tests with a null of trend stationarity |             |         |           |
| KPSS                                    | $\lambda_t$ | > 0.1   | N         |

**Table S5:** Estimated global forcing parameters in equation (3) of OMS for  $\lambda_t$  using DOLS regression allowing for lead and lag differences in variables  $R$  and  $CO_{2,eq}$ .

| Parameter     | Variable                  | Value  | Std.Error | $t$   | $P >  t $ | 95% Conf. Interval |
|---------------|---------------------------|--------|-----------|-------|-----------|--------------------|
| $\gamma_1$    | $T_t$                     | -0.883 | 0.165     | -5.34 | 0         | (-1.217, -0.548)   |
| $\gamma_2$    | $R_t$                     | 0.0072 | 0.011     | 0.65  | 0.518     | (-0.0152, 0.0296)  |
| $\gamma_{2b}$ | $\Delta R_{t-1}$          | 0.0056 | 0.012     | 0.47  | 0.638     | (-0.018, 0.029)    |
| $\gamma_{2c}$ | $\Delta R_{t+1}$          | 0.0173 | 0.012     | 1.44  | 0.159     | (-0.007, 0.042)    |
| $\gamma_3$    | $CO_{2,eq}$               | 4.782  | 1.155     | 4.14  | 0         | (2.44, 7.12)       |
| $\gamma_{3b}$ | $\Delta(CO_{2,eq})_{t-1}$ | -11.98 | 7.965     | -1.5  | 0.141     | (-28.12, 4.16)     |
| $\gamma_{3c}$ | $\Delta(CO_{2,eq})_{t+1}$ | 8.36   | 7.97      | 1.05  | 0.301     | (-7.79, 24.51)     |
| $\gamma_0$    | Constant                  | 0.199  | 0.093     | 2.13  | 0.039     | (0.0101, 0.388)    |
